# Supplementary material for: Analytical Purity Determinations of Universal Food-Spice Curcuma longa through a QbD Validated HPLC Approach with Critical Parametric Predictors and Operable-Design’s Monte Carlo Simulations: Analysis of Extracts, Forced-Degradants, and Capsules and Tablets-Based Pharmaceutical Dosage Forms
Source: MDPI journal article supplement (doi:10.3390/foods12051010), 2023-02-27
Supplement: s1 [file s1]

Supplementary File

**Analytical Purity Determinations of Universal Food-Spice *Curcuma longa* through a QbD Validated HPLC Approach with Critical Parametric Predictors and Operable-Design's Monte Carlo Simulations: Analysis of Extracts, Forced-Degradants, and Capsules and Tablets-Based Pharmaceutical Dosage Forms**

**TABLES:** Table S1. Design matrix with factorials and responses

| Run | Factor |            |              | Response     |              |            |            |         |            |            |         |
|-----|--------|------------|--------------|--------------|--------------|------------|------------|---------|------------|------------|---------|
|     | 1      | 2          | 3            | 1            | 2            | 3          | 4          | 5       | 6          | 7          | 8       |
|     | A: pH  | B: ACN (%) | C: Temp (°C) | Resolution 1 | Resolution 2 | RT BDMCR ) | RT (DMCR ) | RT (CR) | TP BDMCR ) | TP (DMCR ) | TP (CR) |
| 1   | 3.5    | 50         | 35           | 1.98         | 1.78         | 5.82       | 6.52       | 7.22    | 4795       | 3708       | 3747    |
| 2   | 2.5    | 50         | 35           | 2.12         | 2            | 5.39       | 6          | 6.66    | 5893       | 4827       | 5331    |
| 3   | 3      | 60         | 30           | 1.42         | 1.36         | 4.22       | 4.3        | 4.53    | 4753       | 3344       | 3637    |
| 4   | 2.5    | 50         | 25           | 1.85         | 1.75         | 5.49       | 6.02       | 6.59    | 5971       | 5019       | 5345    |
| 5   | 3.5    | 70         | 35           | 0.89         | 0.9          | 2.38       | 2.51       | 2.66    | 655        | 679        | 2637    |
| 6   | 2.5    | 70         | 25           | 0.98         | 0.85         | 2.51       | 2.64       | 2.79    | 666        | 685        | 3523    |
| 7   | 3.5    | 50         | 35           | 2            | 1.89         | 5.87       | 6.55       | 7.29    | 5463       | 4686       | 3937    |
| 8   | 2.5    | 70         | 35           | 0.93         | 0.94         | 2.38       | 2.51       | 2.66    | 687        | 643        | 3430    |
| 9   | 3.5    | 50         | 25           | 1.98         | 1.53         | 6.51       | 7.18       | 7.9     | 5800       | 4644       | 3699    |
| 10  | 2.5    | 70         | 35           | 0.92         | 0.93         | 2.39       | 2.51       | 2.66    | 679        | 655        | 3430    |
| 11  | 2.5    | 70         | 25           | 0.85         | 0.83         | 2.45       | 2.57       | 2.72    | 675        | 1139       | 3389    |
| 12  | 3.5    | 50         | 35           | 2            | 1.89         | 5.87       | 6.55       | 7.29    | 5012       | 3879       | 3823    |
| 13  | 3.5    | 70         | 25           | 0.9          | 0.92         | 2.41       | 2.5        | 2.63    | 2911       | 2639       | 2888    |
| 14  | 2.5    | 50         | 35           | 2.1          | 1.97         | 5.39       | 5.99       | 6.64    | 5869       | 4738       | 5204    |
| 15  | 3.5    | 50         | 25           | 1.86         | 1.55         | 6.48       | 7.14       | 7.83    | 5659       | 3262       | 3727    |
| 16  | 2.5    | 70         | 25           | 0.848        | 0.832        | 2.51       | 2.64       | 2.79    | 6777       | 1190       | 3523    |
| 17  | 3      | 60         | 30           | 1.44         | 1.34         | 4.18       | 4.32       | 4.48    | 4813       | 3042       | 3631    |
| 18  | 2.5    | 50         | 35           | 2.21         | 2.04         | 5.84       | 6.5        | 7.21    | 6134       | 4986       | 5456    |
| 19  | 2.5    | 50         | 25           | 2.02         | 1.87         | 6.04       | 6.65       | 7.31    | 6428       | 5600       | 5683    |
| 20  | 2.5    | 70         | 35           | 0.94         | 0.95         | 2.39       | 2.51       | 2.66    | 687        | 645        | 3268    |
| 21  | 3      | 60         | 30           | 1.43         | 1.31         | 4.21       | 4.39       | 5.1     | 4855       | 3265       | 3635    |
| 22  | 3.5    | 70         | 25           | 0.9          | 0.91         | 2.44       | 2.56       | 2.7     | 2895       | 2652       | 2892    |
| 23  | 3.5    | 70         | 35           | 0.9          | 0.92         | 2.38       | 2.51       | 2.66    | 655        | 684        | 2876    |
| 24  | 3.5    | 50         | 25           | 1.79         | 1.54         | 5.99       | 6.6        | 7.23    | 5290       | 3242       | 3625    |

|    |     |    |    |      |      |      |      |      |      |      |      |
|----|-----|----|----|------|------|------|------|------|------|------|------|
| 25 | 2.5 | 50 | 25 | 1.9  | 1.78 | 5.88 | 6.46 | 7.07 | 6227 | 5036 | 5463 |
| 26 | 3.5 | 70 | 35 | 0.91 | 0.91 | 2.38 | 2.51 | 2.66 | 649  | 695  | 2856 |
| 27 | 3.5 | 70 | 25 | 0.91 | 0.92 | 2.42 | 2.55 | 2.69 | 2881 | 2599 | 2895 |

**Table S2.** Model equations for all other responses

| Response        | Model                                                                                                                                                                                                        |
|-----------------|--------------------------------------------------------------------------------------------------------------------------------------------------------------------------------------------------------------|
| $R_{s1}$        | $=+1.65833+0.46\text{pH}-0.016283\text{ACN}+0.132667\text{Temp}-0.004967\text{pH}*\text{ACN}-0.026\text{pH}*\text{Temp}-0.001697\text{ACN}*$<br>$\text{Temp}+0.000313\text{pH}*\text{ACN}*\text{Temp}$       |
| $R_{s2}$        | $=+9.95458-2.75417\text{pH}-0.146508\text{ACN}-0.119083\text{Temp}+0.044383\text{pH}*\text{ACN}+0.065833\text{pH}$<br>$*\text{Temp}+0.002238\text{ACN}*\text{Temp}-0.001097\text{pH}*\text{ACN}*\text{Temp}$ |
| $(Rt_{CMN})$    | $=+5.27333+5.18\text{pH}-0.020333\text{ACN}+0.2355\text{Temp}-0.078667\text{pH}*\text{ACN}-0.105\text{pH}*\text{Temp}-0.003850\text{ACN}*$<br>$\text{Temp}+0.001633\text{pH}*\text{ACN}*\text{Temp}$         |
| $(Rt_{DMCMN})$  | $=+5.19333+4.71333\text{pH}-0.023\text{ACN}+0.1945\text{Temp}-0.071333\text{pH}*\text{ACN}-0.097\text{pH}*\text{Temp}-0.003217\text{ACN}*$<br>$\text{Temp}+0.0015\text{pH}*\text{ACN}*\text{Temp}$           |
| $(Rt_{BDMCMN})$ | $=+5.21792+4.21083\text{pH}-0.027542\text{ACN}+0.154917\text{Temp}-0.06325\text{pH}*\text{ACN}-0.0885\text{pH}*\text{Temp}-$<br>$0.002575\text{ACN}*\text{Temp}+0.00135\text{pH}*\text{ACN}*\text{Temp}$     |
| $(TP_{CMN})$    | $=+30528.04167-7666.25\text{pH}-361.7875\text{ACN}-311.375\text{Temp}+101.125\text{pH}*\text{ACN}+111.45\text{pH}*\text{Temp}+4.30083$<br>$\text{ACN}*\text{Temp}-1.59167\text{pH}*\text{ACN}*\text{Temp}$   |
| $(TP_{DMCMN})$  | $=+95386.66-31458.16\text{pH}-1535.3\text{ACN}-2089.88\text{Temp}+529.3\text{pH}*\text{ACN}$<br>$+820.13\text{pH}*\text{Temp}+35.01\text{ACN}*\text{Temp}-13.98\text{pH}*\text{ACN}*\text{Temp}$             |
| $(TP_{BDMCMN})$ | $=+71381.58-19652.33\text{pH}-1291.21\text{ACN}-1278.58\text{Temp}+393.01\text{pH}*\text{ACN}+476.2\text{pH}*$<br>$\text{Temp}+26.33\text{ACN}*\text{Temp}-10.02\text{pH}*\text{ACN}*\text{Temp}$            |

**Table S3.** Intraday and interday accuracy and precision of curcuminoids

| Compound | Concentration | Intraday                       |                         | Interday                       |                         |
|----------|---------------|--------------------------------|-------------------------|--------------------------------|-------------------------|
|          |               | Accuracy<br>(recovery%±<br>SD) | Repeatability<br>(RSD%) | Accuracy<br>(recovery%±<br>SD) | Repeatability<br>(RSD%) |
| CMN      | 1             | 99.63±0.37                     | 0.38                    | 99.32±0.34                     | 0.35                    |
|          | 10            | 99.65±0.41                     | 0.41                    | 99.56±0.39                     | 0.4                     |
|          | 20            | 98.76±0.32                     | 0.32                    | 99.51±0.17                     | 0.17                    |
| DMCMN    | 1             | 99.13±0.7                      | 0.71                    | 99.29±0.64                     | 0.65                    |
|          | 5             | 99.6±0.4                       | 0.41                    | 99.53±0.5                      | 0.51                    |
|          | 9             | 99.89±0.63                     | 0.64                    | 99.71±0.26                     | 0.27                    |
| BDMCMN   | 1             | 99.73±1.66                     | 1.67                    | 99.84±0.19                     | 0.19                    |
|          | 2             | 99.71±0.59                     | 0.6                     | 99.81±0.09                     | 0.09                    |
|          | 4             | 99.89±0.63                     | 0.64                    | 99.43±0.74                     | 0.75                    |

## FIGURES:

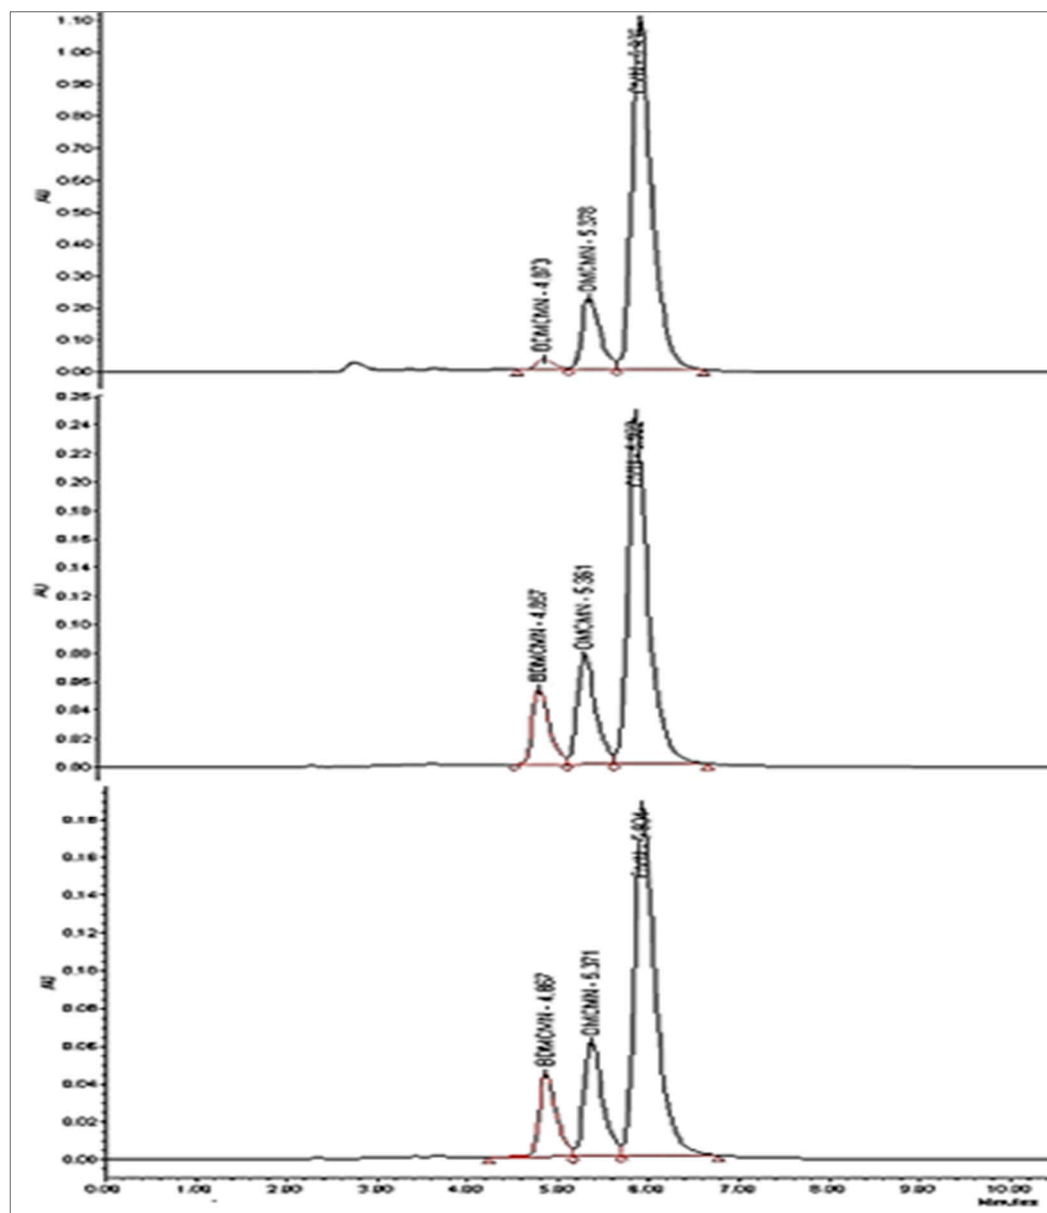

**Figure S1.** Full time (20 min.) HPLC chromatogram obtained under the optimum conditions of Solgar® Curcumin Full Spectrum (A); *Curcuma longa* after extraction with acetone (B); *Curcuma longa* after extraction with ethanol (C).
